# Supplementary material for: The role of diatom resting spores in pelagic–benthic coupling in the Southern Ocean
Source: Copernicus journal article supplement (doi:10.5194/bg-15-3071-2018), 2018-05-18
Supplement: Supplementary file 1 [file bg-15-3071-2018-supplement.zip]

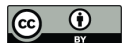

## *Supplement of*

# **The role of diatom resting spores in pelagic–benthic coupling in the Southern Ocean**

**Mathieu Rembauville et al.**

*Correspondence to:* Ian Salter ([ian.salter@obs-banyuls.fr](mailto:ian.salter@obs-banyuls.fr), [ians@hav.fo](mailto:ians@hav.fo))

- [bg-15-3071-2018-supplement-title-page.pdf](#)
- [bg-2017-414 Supplement\\_2017\\_05\\_14.xlsx](#)

The copyright of individual parts of the supplement might differ from the CC BY 4.0 License.
